1 **Full Title**

2 Computational modelling of atherosclerosis: developing a community resource.

3

4 **Authors**

5 Andrew Parton BSc

- 6 • Northern Ireland Centre for Stratified Medicine, Ulster University

7

8 Victoria McGilligan BSc PhD

- 9 • Northern Ireland Centre for Stratified Medicine, Ulster University

10

11 Maurice O’Kane BSc MBChB MD

- 12 • Western Health and Social Care Trust, Altnagelvin Hospital

- 13 • Northern Ireland Centre for Stratified Medicine, Ulster University

14

15 Steven Watterson MPhys PhD

- 16 • Northern Ireland Centre for Stratified Medicine, Ulster University

17

18 **Short Title**

19 Computational modelling of atherosclerosis

20

21 **Corresponding author**

22 Steven Watterson, s.watterson@ulster.ac.uk

23 Northern Ireland Centre for Stratified Medicine, Ulster University, C-TRIC building,

24 Altnagelvin Hospital Campus, Derry, Co Londonderry, Northern Ireland, UK, BT47

25 6SB

26

27 **Total word count:** 7666

28

29

30

31 **Subject Codes:** Atherosclerosis, Computational Biology, Lipids and Cholesterol, Cell

32 Signaling/Signal Transduction, Cardiovascular Disease

33

34

35

36

37

1 **Abstract**

2 **Rationale.** Atherosclerosis is a dynamical process that emerges from the interplay  
3 between lipid metabolism, inflammation and innate immunity. The arterial location of  
4 atherosclerosis makes it logistically and ethically difficult to study *in vivo*. To improve  
5 our understanding of the disease, we must find alternative ways to investigate its  
6 progression. There is currently no computational model of atherosclerosis openly  
7 available to the research community for use in future studies and for refinement and  
8 development.

9 **Objective.** Here we develop the first predictive computational model to be made  
10 openly available and demonstrate its use for therapeutic hypothesis generation.

11 **Methods and Results.** We compiled a dataset of relevant interactions from the  
12 literature along with available parameters. These were used to build a network  
13 model describing atherosclerotic plaque development. A visual map of the network  
14 model was produced using the Systems Biology Graphical Notation (SBGN) and a  
15 dynamic mathematical description of the network model that enables us to simulate  
16 plaque growth was developed and is made available using the Systems Biology  
17 Markup Language (SBML). We used this model to investigate whether multi-drug  
18 therapeutic interventions could be identified that stimulate plaque regression. The  
19 model produced comprised 20 cell types and 41 proteins with 89 species in total.  
20 The visual map is available for reuse and refinement using the SBGN Markup  
21 Language standard format and the mathematical model is available using the SBML  
22 standard format. We used a genetic algorithm to identify a multi-drug intervention  
23 hypothesis comprising five drugs that comprehensively reverse plaque growth within  
24 the model.

25 **Conclusions.** We have produced the first predictive mathematical and  
26 computational model of atherosclerosis that can be reused and refined by the  
27 cardiovascular research community. We demonstrated its potential as a tool for  
28 future studies of cardiovascular disease by using it to identify multi-drug intervention  
29 hypotheses.

30  
31  
32  
33  
34  
35

36 Keywords: atherosclerosis, cardiovascular disease, computational modelling,  
37 systems biology

1 **Non standard Abbreviations and Acronyms**

- 2 ApoB - apolipoprotein B  
3 BRENDA - Braunschweig Enzyme Database  
4 CCL2 - chemokine (C-C motif) ligand 2  
5 CCL5 - chemokine (C-C motif) ligand 5  
6 CVD – Cardiovascular Disease  
7 CXCL9 - Chemokine (C-X-C motif) ligand 9  
8 CXCL10 - Chemokine (C-X-C motif) ligand 10  
9 CXCL11 - Chemokine (C-X-C motif) ligand 11  
10 HDL – High Density Lipoprotein  
11 HMG-CoA - 3-hydroxy-3-methylglutaryl-coenzyme A  
12 HPF – High Powered Field  
13 IDL – Intermediate Density Lipoprotein  
14 IFNg - Interferon gamma  
15 IL1b - Interleukin 1 beta  
16 IL6 - Interleukin 6  
17 IL10 - Interleukin 10  
18 IL12 - Interleukin 12  
19 IL12R - Interleukin 2 Receptor  
20 IL18 - Interleukin 18  
21 IL18R - Interleukin 8 Receptor  
22 IL2 - Interleukin 2  
23 KEGG - Kyoto Encyclopedia of Genes and Genomes  
24 LDL – Low Density Lipoprotein  
25 LDLR - Low Density Lipoprotein Receptor  
26 MCP1 - Monocyte chemotactic protein 1  
27 MCSF - macrophage colony-stimulating factor  
28 MMP1 - Matrix metalloproteinase-1  
29 MMP9 - Matrix metalloproteinase-9  
30 ODE – Ordinary Differential Equation  
31 PCSK9 - Proprotein convertase subtilisin/kexin type 9  
32 PDGF - Platelet-derived growth factor  
33 PLA2 - Phospholipase A2  
34 SBGN – Systems Biology Graphical Notation  
35 SBGN-ML – Systems Biology Graphical Notation – Markup Language  
36 SBML – Systems Biology Markup Language  
37 SMase - Sphingomyelin phosphodiesterase  
38 TGFb - Transforming growth factor beta  
39 TIMP1 - tissue inhibitors of metalloproteinases 1  
40 TNFa - tumor necrosis factor alpha  
41 VLDL – Very Low Density Lipoprotein  
42 XML - eXtensible Markup Language

## 1 **1. Introduction**

2 Cardiovascular disease (CVD) is the primary cause of global mortality. CVD  
3 is estimated to account for 17m deaths worldwide each year, representing 31% of all  
4 cause mortality worldwide and 47% of all cause mortality within Europe<sup>a</sup>. Such a  
5 prevalent condition incurs a significant financial burden, accounting for 17% of all  
6 healthcare expenditure in the USA<sup>1</sup>. Age is a significant risk factor and with an aging  
7 population, the cost of CVD related therapies is predicted to almost triple in the USA  
8 from \$273 billion in 2010 to \$818 billion by 2030<sup>1</sup>.

9  
10 Atherosclerosis is estimated to account for 71% of CVD diagnoses<sup>a</sup>. It is  
11 characterised by the hardening of an artery wall, and the formation of a fibrous-fatty  
12 lesion within the intimal layer. As the disorder progresses, thick extracellular cores of  
13 lipid build within the artery wall, occluding the artery and subsequently reducing  
14 blood flow. Thrombosis can further occlude the artery either as a result of plaque  
15 rupture or turbulent blood flow induced around the site of the atheroma.

16  
17 Despite our increasing knowledge of the mechanisms driving this disorder, the  
18 pathogenesis of atherosclerosis is still not fully understood. In part, this is due to the  
19 significant challenge inherent in studying live, dynamic plaques. Accessing plaques  
20 *in vivo* is logistically difficult, necessitating catheterization, and ethically challenging  
21 as it can increase the risk of plaque rupture. As a result, alternative approaches to  
22 studying atherosclerosis dynamics are needed. Computational modelling has the  
23 potential to be especially valuable here due to its flexibility, low financial and ethical  
24 cost, consistency and ease of replication. However, currently there are no  
25 computational or mathematical models of atherosclerosis that are easily available to  
26 the research community for use in exploratory studies.

27  
28 In previous modelling studies the majority of work has focused on plaque initiation  
29 and haemodynamics<sup>2</sup>, where Navier-Stokes dynamics have described blood flow and  
30 wall shear stress has been calculated as an pro-atherogenic output<sup>3</sup>. We are  
31 interested in the molecular and cellular biology that mediate plaque formation and  
32 can furnish targets for therapeutic interventions. However, in previous studies these  
33 details have been routinely omitted or simplified for reasons of mathematical  
34 expediency<sup>4</sup>. Furthermore, the resulting models have not been made publicly  
35 available. Reusing this work would necessitate reconstruction of the models in their  
36 entirety, a complex, time consuming and error-prone task. At the present time, the  
37 European Bioinformatics Institute (EBI) Biomodels database<sup>b</sup> contains only one  
38 model pertaining to atheroma formation, focussing on lipoprotein action and B-cell  
39 signaling with little detail on the mechanisms of plaque formation<sup>5</sup>. KEGG<sup>6</sup>,  
40 Reactome<sup>7</sup> and Wikipathways<sup>8</sup> contain no molecular biology maps of atherosclerosis.

---

<sup>a</sup> [http://www.escardio.org/static\\_file/Escardio/Press-media/press-releases/2013/EUcardiovascular-disease-statistics-2012.pdf](http://www.escardio.org/static_file/Escardio/Press-media/press-releases/2013/EUcardiovascular-disease-statistics-2012.pdf)

<sup>b</sup> <https://www.ebi.ac.uk/biomodels-main/>

1 Here we develop the first detailed, predictive dynamical computational model of  
2 atherogenesis using Systems Biology standards. The model comprises a map  
3 composed using the Systems Biology Graphical Notation (SBGN)<sup>9</sup> and made  
4 available to the research community for reuse and refinement using the Systems  
5 Biology Graphical Notation Markup Language (SBGN-ML)<sup>10</sup>. This map is  
6 accompanied by a mathematical model describing the dynamics of the interactions in  
7 the map as a system of ordinary differential equations (ODEs), and made available  
8 using the Systems Biology Markup Language (SBML)<sup>11</sup>. There are many examples  
9 of SBGN<sup>c</sup> and SBML<sup>d</sup> compliant software.

10  
11 Currently, treatment of atherosclerotic vascular disease focuses on limiting disease  
12 progression (though smoking cessation, lipid lowering and anti-platelet therapies and  
13 optimal management of hypertension and diabetes) and revascularisation procedures  
14 such as angioplasty and bypass grafting to clinically relevant stenotic lesions in the  
15 coronary, peripheral or cerebral vasculature. Although such treatments are clinically  
16 effective, it is less clear whether medical therapies can reduce plaque size, although  
17 there is some evidence to suggest that intense statin treatment<sup>12</sup>, combined statin-  
18 PCSK9 inhibitor treatment<sup>13</sup> or Cyclodextrin treatment<sup>14</sup> may yield a modest plaque  
19 reduction. New drug combinations that yield a substantial reduction in plaque size  
20 could have a dramatic impact on CVD morbidity and mortality and so their  
21 identification has high strategic importance. Here, we employ the model to develop  
22 effective therapeutic hypotheses comprising multi-drug combinations.

## 23 24 **2. Methods**

25 A list of the cell types involved in atherosclerosis was compiled from the existing  
26 literature (see supplementary table 4). Each article identified was also searched for  
27 references to proteins and small molecules with each entity found considered for the  
28 model. A protein or small molecule was incorporated into the model if its biological  
29 source, presence within a relevant compartment and its influence on atherogenesis  
30 (however minor) were all described. The model was assembled with CellDesigner<sup>15</sup>  
31 using the SBGN schema and with mass action and Michaelis-Menten equations  
32 primarily used to describe the dynamics. The resulting model was exported to  
33 SBGN-ML file format to disseminate the visual map and to SBML file format to  
34 disseminate the mathematical model describing the dynamics.

35  
36 PubMed and Google Scholar searches were undertaken to find studies describing  
37 representative concentrations of the cells, proteins and small molecules. The  
38 BRENDA enzyme database was searched for relevant known rate parameters<sup>16</sup>.  
39 Values for unknown parameters were calculated by constraining the model to show  
40 dynamics in agreement with published CVD studies. We considered dynamics for  
41 three lipid profiles: high risk, medium-risk and low-risk comprising LDL  
42 concentrations of 190 mg/dl<sup>e</sup>, 110 mg/dl<sup>e</sup> and 50mg/dl<sup>17</sup>, respectively and HDL  
43 concentrations of 40 mg/dl, 50 mg/dl and 50 mg/dl, respectively<sup>18</sup>. Atherosclerosis is

---

<sup>c</sup> [http://sbgn.github.io/sbgn/software\\_support](http://sbgn.github.io/sbgn/software_support)

<sup>d</sup> [http://sbml.org/SBML\\_Software\\_Guide](http://sbml.org/SBML_Software_Guide)

<sup>e</sup> <https://www.nhlbi.nih.gov/health/resources/heart/heart-cholesterol-hbc-what.html>

1 considered to be a chronic condition. Hence, we considered plaque formation across  
2 a representative time scale of 80 years.

3  
4 There are between 5 and 800 cells within a plaque area per high powered field (HPF)  
5 at 400x magnification<sup>19</sup>, where one HPF displays approximately 0.2mm<sup>2</sup> of plaque  
6 area<sup>20</sup>. We estimate that a plaque contains between 25 and 4000 cells per mm<sup>2</sup>.  
7 Average plaque area has been shown to be 15.2mm<sup>2</sup> (21), giving the number of cells  
8 in a plaque as being between 380 and 60800. With this, we identified the following  
9 constraints from the published literature.

10  
11 I) Smooth muscle cells comprise 35.10% of the cellular composition of plaques<sup>20</sup>,  
12 corresponding to a range of 133 cells which we take to be representative of low LDL  
13 profiles to 21341 cells which we take to be representative of high LDL profiles.

14 II) Macrophages (including foam cells) comprise 34.07% of the cellular composition  
15 of plaques<sup>20</sup>, corresponding to a range of 129 cells to 20715 cells.

16 III) The ratio of Th1 to non-Th1 cells in a plaque is approximately 0.3<sup>22</sup>,  
17 corresponding to a range of 88 Th1 cells to 14031 Th1 cells.

18 IV) Blood serum concentrations of MCP1/CCL2 were estimated from myocardial  
19 infarction and ischemic stroke patients, ranging from 100 pg/ml to 775 pg/ml<sup>23</sup>.

20 V) Blood serum concentrations of CXCL9 were estimated from patients assessed for  
21 coronary artery calcium deposits, ranging from 17.4 pg/ml to 271.2 pg/ml<sup>24</sup>.

22 VI) Blood serum concentrations of CXCL10 were estimated from patients assessed  
23 for coronary artery disease, ranging from 127.6 pg/ml to 956.5 pg/ml<sup>25</sup>.

24 VII) Blood serum concentrations of CXCL11 were estimated from control groups in  
25 transplantation studies, ranging from 420 pg/ml to 1062 pg/ml<sup>26</sup>.

26 VIII) Blood serum concentrations of IL1b were estimated from congestive heart  
27 failure and control patients, ranging from 0.28 pg/ml to 2.12 pg/ml<sup>27</sup>.

28 IX) Plaque concentrations of TIMP1 were estimated from carotid endarterectomy  
29 patients, ranging from 5.3 µg/g to 12.4 µg/g wet weight of plaque<sup>28</sup>.

30 X) Plaque concentrations of IFNγ were estimated from carotid endarterectomy  
31 patients, ranging from 20 pg/g to 182 pg/g wet weight of plaque<sup>29</sup>.

32 XI) Plaque concentrations of TGFβ were estimated from control and coronary artery  
33 disease patients, ranging from 0.33 mg/g to 0.76 mg/g of protein<sup>30</sup>.

34 XII) Plaque density ratios of chymase to tryptase were recorded to be 107.8:135.1 in  
35 plaques<sup>31</sup>.

36 XIII) T Cells comprise 30.82% of the cellular composition of plaques<sup>20</sup>, corresponding  
37 to a range of 117 cells to 18739 cells.

38 XIV) Blood serum concentrations of CCL5 were estimated from control and coronary  
39 event patients, ranging from 2.7 ng/ml to 176.0 ng/ml, respectively<sup>32</sup>.

40 XV) Plaque concentrations of MMP1 were estimated from carotid endarterectomy  
41 patients, ranging from 18 ng/g to 104 ng/g wet weight of plaque<sup>28</sup>.

42 XVI) Plaque concentrations of MMP9 were estimated from carotid endarterectomy  
43 patients, ranging from 121 ng/g to 722 ng/g wet weight of plaque<sup>28</sup>.

44 XVII) Plaque concentrations of IL1b were estimated from carotid endarterectomy  
45 patients, ranging from 12 ng/g to 24 ng/g wet weight of plaque<sup>28</sup>.

46 XVIII) Plaque concentrations of IL6 were estimated from carotid endarterectomy  
47 patients, ranging from 1.5 µg/g to 5.1 µg/g wet weight of plaque<sup>28</sup>.

- 1 XIX) Plaque concentrations of TNF $\alpha$  were estimated from carotid endarterectomy  
2 patients, ranging from 15 ng/g to 27 ng/g wet weight of plaque<sup>28</sup>.  
3 XX) Plaque concentrations of IL10 were estimated from arterial occlusion patients,  
4 ranging from 1.51 pg/mg to 2.29 pg/mg wet weight of plaque<sup>33</sup>.  
5 XXI) Plaque concentrations of IL12 were estimated from arterial occlusion patients,  
6 ranging from 3.6 pg/mg to 4.6 pg/mg wet weight of plaque<sup>33</sup>.  
7 XXII) Plaque concentrations of elastin were estimated from acute coronary syndrome  
8 patients, giving 1.58 mg/g wet weight of plaque<sup>34</sup>.  
9 XXIII) Plaque concentrations of collagen were estimated from acute coronary  
10 syndrome patients, giving 6.26 mg/g wet weight of plaque<sup>34</sup>.  
11 XXIV) Plaque concentrations of PDGF were estimated from carotid endarterectomy  
12 patients, ranging from 279 pg/g to 1381 pg/g wet weight of plaque<sup>29</sup>.  
13 XXV) The weight of oxidized LDL per weight of ApoB has been measured to be 19.6  
14 ng/ $\mu$ g in macrophage rich plaques and 1.9 ng/ $\mu$ g in normal intimal tissue<sup>35</sup>. The  
15 plaque concentration of ApoB has been measured to range from 1.97  $\mu$ g/mg to 0.13  
16  $\mu$ g/mg<sup>36</sup>, yielding upper and lower estimates for oxidised LDL concentrations of 38.6  
17  $\mu$ g/g and 0.25  $\mu$ g/g.  
18 XXVI) Plaque concentrations of IL2 were estimated from acute coronary syndrome  
19 patients, giving 24.0 pg/mg of protein<sup>37</sup>.  
20 XXVII) Plaque concentrations of IL18 were estimated from acute coronary syndrome  
21 patients, giving 10.7 pg/mg of protein<sup>37</sup>.  
22 XXVIII) Blood serum concentrations of chylomicrons were estimated from a control  
23 group and hyperlipidemic patients, corresponding to 1.4  $\mu$ g/ml and 52.6  $\mu$ g/ml,  
24 respectively<sup>38</sup>.  
25 XXIX) Blood serum concentrations of triglycerides were estimated from a control  
26 group and hyperlipidemic patients, corresponding to 58 mg/dl and 1005 mg/dl,  
27 respectively<sup>38</sup>.  
28 XXX) The ratio of Th1 to Th2 cells has been shown to correlate with atherogenesis<sup>39</sup>.  
29 XXXI) Animal models with advanced atherosclerosis have shown plaque reduction  
30 mediated by reverse cholesterol after a reduction in lipid profile<sup>40</sup>.

31  
32 After an initial model was constructed with the known parameter values, the unknown  
33 parameters were optimised to ensure that the model adhered to these experimental  
34 results as far as possible.

### 35 36 *Multi-drug plaque regression therapeutic hypotheses*

37 In order to demonstrate the utility of the model, we undertook to identify an optimal  
38 multi-drug intervention hypothesis that would reprogram the dynamics of the model  
39 leading to regression of advanced plaques. It has been demonstrated that multidrug  
40 approaches have the potential to exploit compound effects to yield effective  
41 interventions at lower individual and collective dosages than in comparable single-  
42 drug interventions, reducing the risk from pleiotropic effects<sup>41</sup>. This is an example of  
43 the type of investigation that would be extremely complex to undertake clinically and  
44 yet can be undertaken computationally with relative ease.

45  
46 We identified the following 9 drugs with targets in the model (proteins they inhibit in  
47 brackets): 2-(4-Chloro-3-(trifluoromethyl)phenoxy)-5-(((1-methyl-6-morpholino-2-oxo-  
48 1,2-dihydropyrimidin-4-yl)oxy)methyl)benzotrile (PLA2), GW4869 (SMase),

1 Quercetin Monoglucoside (Lipoxygenase), cFMS Receptor Inhibitor III (MCSF),  
2 Bindarit (CCL2), Imatinib Mesylate (PDGF), Ustekinumab (IL12R), GSK1070806  
3 (IL18R), SCH546738 (CXCL9, CXCL10, CXCL11, CCL5). Concentrations were  
4 presented as multiples of the corresponding  $k_i$  and because PLA2, SMase and  
5 Lipoxygenase all catalyse the same interaction, we constrained these drugs to have  
6 the same concentration, giving a set of drugs with seven degrees of freedom.

7  
8 We used the MATLAB<sup>f</sup> software system and a genetic algorithm with a population  
9 size of 10000 for 100 generations to identify the optimal combination of drugs that  
10 would drive atherosclerosis regression. The genetic algorithm started from one  
11 instance of a set of drug concentrations and from this generated a further 9999  
12 instances of sets of drug concentrations from the first by adding Gaussian noise to  
13 the concentration of each drug (with standard deviation 1, the default setting). These  
14 10000 instances comprised the first generation of candidate interventions. All  
15 instances were evaluated for their efficacy at plaque reduction and 10000 new  
16 instances were created as a second generation of candidate interventions from the  
17 two most effective instances of the first generation (with the addition of Gaussian  
18 noise). The 10000 new instances were then themselves evaluated with the two most  
19 effective instances being used to generate a further 10000 new instances, the third  
20 generation. This process was iterated until we arrived at instances from which no  
21 improvement in efficacy could be found at which point the best performing instance  
22 was interpreted as optimal. In order to evaluate the efficacy of a particular instance,  
23 we constructed a scoring function that allowed the model to develop using the high  
24 risk profile for the first forty years before introduction of the drug concentrations of the  
25 instance at forty years. The model then continued to run for a further forty years and  
26 at eighty years we calculated a score for the instance as  $S = (C/C_{max} + T/T_{max})/2 +$   
27  $0.01 * (\text{sum of drug concentrations})$  where C is the sum of smooth muscle cells,  
28 macrophages, foam cells and T-cells observed and  $C_{max}$  is the sum of smooth  
29 muscle cells, macrophages, foam cells and T-cells that would occur at eighty years in  
30 the absence of any drugs. T is the collagen concentration observed and  $T_{max}$  is the  
31 collagen concentration that would occur at eighty years in the absence of any drugs.  
32 This score describes the efficacy of the instance of a set of drugs at driving plaque  
33 regression with effective interventions yielding lower numbers and ineffective  
34 interventions yielding higher numbers. The score also included the sum of the  
35 concentrations of the drugs used. Low scores also ensure that the dosages are  
36 minimal, yielding therapeutic hypotheses with reduced risks of off-target effects. At  
37 each generation, the genetic algorithm selected the two instances with the lowest  
38 scores. The analysis was run on an Intel(R) Xeon(R) CPU E5-2630 v3 @ 2.6GHz  
39 (Octo-core) CPU with 64GB of RAM running CentOS 7.

### 40 41 **3. Results**

42 A visual map of the model obtained is shown in Figure 1 using the SBGN schema.  
43 The model covers five distinct organs and tissues: the liver, intestine, lumen,  
44 endothelium and tunica intima. It covers LDL retention, LDL oxidation, monocyte  
45 recruitment, monocyte differentiation, smooth muscle cell proliferation, phagocytosis,  
46 reverse cholesterol transport and T-cell proliferation. The cell types involved include

---

<sup>f</sup> <https://www.mathworks.com>



1 monocytes, endothelial cells, T-cells, macrophages, foam cells, B-cells, smooth  
2 muscle cells, neutrophils, dendritic cells and mast cells. A legend describing the  
3 glyphs of the SBGN schema is shown in Figure 2. Each interaction represents a  
4 parameterized equation (see supplementary table 1 for the equations and  
5 supplementary table 2 for the parameters), enabling us to dynamically simulate the  
6 changing concentrations/abundances of the model as the plaque forms.

7  
8 The initial conditions identified are described in supplementary table 1 and unknown  
9 parameters were optimised so that the model maximally satisfied the constraints  
10 described above simultaneously. Key markers for plaque development include  
11 smooth muscle cell, macrophage and foam cell and Th1 cell proliferation. Their  
12 behavior is shown in Figure 3 for the three risk profiles.

13  
14 The model satisfies the constraints as follows. Results are stated at 80 years with  
15 constraint values in brackets.

16  
17 I) Figure 3A shows smooth muscle cell abundance, yielding 42287 cells (21341) and  
18 230 cells (133), for high and low risk profiles, respectively.

19 II) Figure 3B shows combined macrophage and foam cell abundance, yielding 27630  
20 cells (20715) and 3463 cells (129) for high and low risk profiles, respectively.

21 III) Figure 3C shows Th1 cell abundance, yielding 7186 cells (14031) and 223 cells  
22 (88) for high and low risk profiles, respectively.

23 IV) Figure 4.1 shows MCP1/CCL2 blood serum concentration, yielding 649.8 pg/ml  
24 (775 pg/ml) and 163.8 pg/ml (100 pg/ml) for high and low risk profiles, respectively.

25 V) Figure 4.2 shows CXCL9 blood serum concentration, yielding 283.9 pg/ml (271.2  
26 pg/ml) and 23.8 pg/ml (17.4 pg/ml) for high and low risk profiles, respectively.

27 VI) Figure 4.3 shows CXCL10 blood serum concentration, yielding 850.0 pg/ml  
28 (956.5 pg/ml) and 120.9 pg/ml (127.6 pg/ml) for high and low risk profiles,  
29 respectively.

30 VII) Figure 4.4 shows CXCL11 blood serum concentration, yielding 965 pg/ml (1062  
31 pg/ml) and 355 pg/ml (420 pg/ml) for high and low risk profiles, respectively.

32 VIII) Figure 4.5 shows IL1b blood serum concentration, yielding 2.04 pg/ml (2.12  
33 pg/ml) and 0.97 pg/ml (0.28 pg/ml) for high and low risk profiles, respectively.

34 IX) Figure 4.6 shows TIMP1 plaque concentration, yielding 11.5 µg/g (12.4 µg/g) and  
35 3.6 µg/g (5.3 µg/g) for high and low risk profiles, respectively.

36 X) Figure 4.7 shows IFNg plaque concentration, yielding 167 pg/g (182 pg/g) and 5  
37 pg/g (20 pg/g) for high and low risk profiles, respectively.

38 XI) Figure 4.8 shows TGFb plaque concentration, yielding 0.80 mg/g (0.76 mg/g) and  
39 0.05 mg/g (0.33 mg/g) for high and low risk profiles, respectively.

40 XII) Figure 4.9 shows the ratio of plaque density between chymase and tryptase,  
41 yielding 106.0:134.3 (107.8:135.1) for the high risk profile.

42 XIII) Figure 4.10 shows total T cell abundance, yielding 18562 cells (18739) and  
43 8012 cells (117) for high and low risk profiles, respectively.

44 XIV) Figure 4.11 shows CCL5 blood serum concentration, yielding 181.1 ng/ml  
45 (176.0 ng/ml) and 45.7 ng/ml (2.7 ng/ml) for high and low risk profiles, respectively.

46 XV) Figure 4.12 shows MMP1 plaque concentration, yielding 86.8ng/g (104 ng/g)  
47 and 0.2 ng/g (18 ng/g) for high and low risk profiles, respectively.

1 XVI) Figure 4.13 shows MMP9 plaque concentration, yielding 609.6 ng/g (722 ng/g)  
2 and 1.6 ng/g (121 ng/g) for high and low risk profiles, respectively.  
3 XVII) Figure 4.14 shows IL1b plaque concentration, yielding 23.6 ng/g (24 ng/g) and  
4 0.1 ng/g (12ng/g) for high and low risk profiles, respectively.  
5 XVIII) Figure 4.15 shows IL6 plaque concentration, yielding 5.3 µg/g (5.1 µg/g) and  
6 0.025 µg/g (1.5 µg/g) for high and low risk profiles, respectively.  
7 XIX) Figure 4.16 shows TNFa plaque concentration, yielding 24 ng/g (27 ng/g) and  
8 0.3 ng/g (15 ng/g) for high and low risk profiles, respectively.  
9 XX) Figure 4.17 shows IL10 plaque concentration, yielding 2.1 ng/g (2.3 ng/g) and  
10 0.6 ng/g (1.5 ng/g) for high and low risk profiles, respectively.  
11 XXI) Figure 4.18 shows IL12 plaque concentration, yielding 5.2 ng/g (4.6 ng/g) and  
12 0.7 ng/g (3.6 ng/g) for high and low risk profiles, respectively.  
13 XXII) Figure 4.19 shows the elastin plaque concentration, yielding 1.85 mg/g (1.58  
14 mg/g) for the high risk profile.  
15 XXIII) Figure 4.20 shows collagen plaque concentration, yielding 4.87 mg/g (6.26  
16 mg/g) for the high risk profile.  
17 XXIV) Figure 4.21 shows PDGF plaque concentration, yielding 1048 pg/g (1381  
18 pg/g) and 2 pg/g (279 pg/g) for high and low risk profiles, respectively.  
19 XXV) Figure 4.22 shows oxidised LDL plaque concentration depending on risk  
20 profile. At 80 years, the high risk profile yields 36.8 µg/g (38.6 µg/g) and the low risk  
21 profile yields 2.6 µg/g (0.25 µg/g).  
22 XXVI) Figure 4.23 shows IL2 plaque concentration, yielding 27 ng/g (24 ng/g) for the  
23 high risk profile.  
24 XXVII) Figure 4.24 shows IL18 plaque concentration, yielding 10.9 ng/g (10.7 ng/g)  
25 for the high risk profile.  
26 XXVIII) Figure 4.25 shows chylomicron blood serum concentration, yielding 49.1  
27 µg/ml (52.6 µg/ml) a value that does not change for low risk profiles (1.4 µg/ml).  
28 XXIX) Figure 4.26 shows triglyceride blood serum concentration, yielding 754 mg/dl  
29 (1005 mg/dl) a value that does not change for low risk profiles (58 mg/dl).  
30 XXX) Figure 4.27 shows foam cell aggregation after the parameter determining rate  
31 of differentiation to Th1 cells has been increased by 10% and the parameter  
32 determining the rate of differentiation to Th2 cells has been decreased by 10%. This  
33 has lead to a modest increase in foam cell concentrations for a high risk profile.  
34 XXXI) Figures 4.28, 4.29 and 4.30 shows oxidized LDL concentration, smooth  
35 muscle cell and foam cell abundance, respectively, when the LDL and HDL are  
36 switched from 190 mg/dl and 40 mg/dl, respectively, to 50mg/dl and 50mg/dl,  
37 respectively, after 40 years, demonstrating plaque reduction.  
38  
39 In addition to addressing these constraints, the model also agrees with the following  
40 clinical results.  
41  
42 XXXII) Blockade of endogenous IL-12 has been shown to reduce atherogenesis<sup>42</sup>.  
43 Figure 5.1 shows that with a 75% reduction to the rate parameters describing IL-12  
44 production, foam cell abundance is significantly reduced for high and mid risk  
45 profiles.  
46 XXXIII) Deficiency of ABCA1 function impairs reverse cholesterol transport and  
47 increases atheroma size<sup>43</sup>. Figure 5.2 shows that with a reduction in the initial

1 ABCA1 concentration by 90%, foam cell concentration is increased across the  
2 lifetime of the simulation.  
3 XXXIV) Deficiency of MCSF reduces monocyte/macrophage circulation and plaque  
4 formation<sup>44</sup>. Figure 5.3 shows that with a reduction in the initial MCSF concentrations  
5 from 100 µg/mg of tissue to 0, macrophage abundance drops significantly within the  
6 plaque.  
7 XXXV) T-cells abundance is reduced as a result of IFNGR knockout<sup>45</sup>. Figure 5.4  
8 shows that decreasing the  $k_{cat}$  rate parameter describing IFNG production by 50%  
9 reduces T-cell abundance within the plaque.  
10 XXXVI) IL-18 has been shown to be atherogenic<sup>46</sup>. Figure 5.5 shows that increasing  
11 the rate parameter describing IL-18 production by 50%, increases smooth muscle  
12 cell recruitment within the plaque.  
13 XXXVII) Reduction in proteoglycan concentration reduces intimal oxLDL  
14 concentrations<sup>47</sup>. Figure 5.6 shows that decreasing the initial concentration of  
15 proteoglycan concentration from 500 µg/mg of tissue to 100 µg/mg of tissue reduces  
16 the concentration of oxidized LDL within the plaque.  
17 XXXVIII) Increasing activity of matrix metalloproteinases leads to degraded  
18 extracellular matrix<sup>48</sup>. Figure 5.7 shows that doubling the binding rate parameter  
19 between extra cellular matrix and matrix metalloproteinases significantly reduces  
20 collagen concentrations.  
21 XXXIX) PLA2 concentration has been shown to correlate with atherogenesis<sup>49</sup>.  
22 Figure 5.8 shows that a reduction in the initial PLA2 concentrations by 90% reduces  
23 the foam cell concentration within the plaque.  
24 XL) Increasing PDGF activity increases smooth muscle cell abundance<sup>50</sup>. Figure 5.9  
25 shows that increasing the rate parameter describing PGDF production by 200%  
26 increases smooth muscle cell recruitment in the plaque.

27

### 28 *Reusability of the model*

29 The visual map is available using the SBGN-ML file format and the mathematical  
30 model is available using the SBML file format from the supplementary material. The  
31 mathematical model is also available from the European Bioinformatics Institute's  
32 Biomodels repository (MODEL1710020000).

33

34 The files can be opened, edited and analysed in software supporting the SBGN-ML  
35 and SBML standards. SBML compliant software includes Copasi<sup>g</sup>, Cytoscape with  
36 the cy3SBML plugin<sup>h</sup> and Dizzy<sup>i</sup>. Figure 6 shows the graphical map opened in three  
37 representative SBGN compliant editors: Newt<sup>j</sup>, PathVisio<sup>k</sup> and VANTED with SBGN-  
38 ED extension<sup>l</sup> along with a subsection of the plain text, XML file.

39

### 40 *Therapeutic hypothesis generation*

---

<sup>g</sup> <http://copasi.org/>

<sup>h</sup> <http://apps.cytoscape.org/apps/cy3sbml>

<sup>i</sup> <http://magnet.systemsbiology.net/software/Dizzy/>

<sup>j</sup> <http://web.newteditor.org/>

<sup>k</sup> <https://www.pathvisio.org/>

<sup>l</sup> <https://immersive-analytics.infotech.monash.edu/vanted/addons/sbgn-ed/>

1 We determined the following drug combination that optimally drove plaque  
2 regression: 2-(4-Chloro-3-(trifluoromethyl)phenoxy)-5-(((1-methyl-6-morpholino-2-  
3 oxo-1,2-dihydropyrimidin-4-yl)oxy)methyl)benzotrile (PLA2) –  $4.35 \times 10^{-5}$ , GW4869  
4 (SMase) –  $4.35 \times 10^{-5}$ , Quercetin Monoglucoside (Lipoxygenase) –  $4.35 \times 10^{-5}$ , Bindarit  
5 (CCL2) – 37.0, cFMS Receptor Inhibitor III (MCSF) – 0, SCH546738 (CXCL9,  
6 CXCL10, CXCL11, CCL5) –  $8.45 \times 10^{-4}$ , Ustekinumab (IL12R) – 7.62, GSK1070806  
7 (IL18R) – 7.60, Imatinib Mesylate (PDGF) – 0, where, concentrations are described  
8 as multiples of the corresponding inhibition constants,  $k_i$ . As can be seen from Figure  
9 7a, this combination was identified quickly by the model with approximately optimal  
10 results being identified within 20 generations. Figures 7b, 7c and 7d show the  
11 dynamics of the model after this intervention is applied at forty years following forty  
12 years of the high risk lipid profile. Here we can see that smooth muscle cells,  
13 macrophages and foam cells and Th1-cell counts are all rapidly driven down by the  
14 intervention.

15

#### 16 **4. Discussion**

17 Atherosclerotic plaques are highly challenging to study due to their location. *In vivo*  
18 study presents logistical and ethical challenges and there are few *in vitro* resources  
19 that can contribute to our understanding of plaque development. Whilst they are not  
20 a complete replacement for *in vivo* studies, computational studies have the potential  
21 to contribute to research in this area, and to yield non-*in vivo* resources that can  
22 improve our understanding of CVD.

23

24 CVD is a large burden on healthcare worldwide. Front line therapies for the primary  
25 and secondary prevention of atherosclerotic disease include smoking cessation, lipid  
26 management, blood pressure control, optimal control of diabetes and the use of  
27 antiplatelet agents. By far the most commonly used class of lipid lowering drugs is  
28 statins, which inhibit HMG CoA reductase. Ezetimibe, a cholesterol absorption  
29 inhibitor, may be used in patients who are statin intolerant or who do not achieve lipid  
30 targets on the highest maximally targeted dose of statin. A new, recently licenced  
31 class of drugs, proprotein convertase subtilisin/kexin type 9 (PCSK9) inhibitors,  
32 suppress degradation of LDLR by PCSK9 and are associated with a significant  
33 reduction in serum LDL concentration and in cardiovascular events. Emerging drugs  
34 include Apolipoprotein B antisense drugs that suppress translation of ApoB, a key  
35 component of LDL, and microsomal triglyceride transfer protein inhibitors that induce  
36 significant LDL reduction.

37

38 Here we have produced a predictive model of the dynamics of atherosclerosis, which  
39 we hope will serve as a resource for the cardiovascular research community that can  
40 be reused, refined and expanded in future. The model we have produced has the  
41 potential to contribute to therapy development through multiple avenues. Primarily,  
42 the model can be used to predict the consequences for the dynamics of  
43 atherosclerosis of interventions that target components of the pathways involved in  
44 the disease. This can be exploited in single drug development by identifying the  
45 components of the model that have the greatest impact on plaque development as  
46 potential drug targets or to multi-drug interventions that achieve similar goals through  
47 compound effects<sup>41</sup>. It is known that atherosclerosis is a comorbidity of diseases  
48 such as rheumatoid arthritis and depression<sup>51</sup>. By using proteomic data from studies

1 of other diseases, this model can also be used to explore the role of atherosclerosis  
2 as a comorbidity. Furthermore, it can be used to explore the possible off-target  
3 impact of therapies for seemingly unrelated conditions, where the therapeutics are  
4 known to have targets within atherosclerosis associated pathways.

5  
6 Although we often consider disease pathologies in isolation, atherosclerosis is part of  
7 a much larger network of interactions and we can use the model to explore the  
8 impact of interventions on the network of interactions that regulate atherosclerosis.  
9 For example, it would be possible to extend the model to include PCSK9 metabolism  
10 in order to explore the impact of PCSK9 inhibitors on plaque development or to  
11 include jak-stat signaling to explore the role of innate immunity on atherosclerosis  
12 progression.

13  
14 The predictions of the model show broad agreement with observed clinical results.  
15 Because the model describes spatial effects and cellular function at extremely simple  
16 levels, it is unlikely to be able to recreate all clinical results exactly. Doing so would  
17 require a model of greater complexity across multiple length scales. However, the  
18 model presented here demonstrates order of magnitude agreement in almost all  
19 cases and shows the correct qualitative dose responses. We found it challenging to  
20 optimise the parameters so as to ensure a sufficiently large response to changes in  
21 lipoprotein profile for particular model components. As a result, particular  
22 components are systematically over-estimated for the low LDL profile and the  
23 difference between high and low LDL profiles, although large, is not as great as that  
24 observed clinically. In changing the lipid profile, we adjusted the concentrations of  
25 LDL and HDL in the model. This logically does not impact on the model components  
26 upstream of LDL and HDL. Hence, as observed in XXVIII and XXIX, we would  
27 expect to see no resulting change in chylomicron or triglyceride concentrations. To  
28 achieve this would require either generating VLDL and IDL values across patient risk  
29 profiles or incorporating greater feedback into the model.

30  
31 A predictive model of this type has the potential to move the discussion around  
32 disease from an understanding of behavior of individual disease components (such  
33 as foam cell accumulation or smooth muscle cell recruitment) to an understanding of  
34 the dynamics of the network and of how the network as a whole transitions from  
35 healthy dynamics to disease dynamics.

36  
37 As demonstrated, a model of this form can be used to develop therapeutic  
38 hypotheses. In principle, the model can be adapted to individuals or to patient  
39 subgroups by tuning the parameters of the interactions enabling it to contribute to  
40 programmes of personalized or stratified medicine. Parameterisations that are  
41 tailored to individuals could be identified by optimizing the model to patient or patient  
42 group time course data or from computational inference from single nucleotide  
43 polymorphism or genome data. Adapting the model to represent the disease  
44 dynamics of individual patients or patient subgroups would support the development  
45 of therapeutic hypotheses that are tailored to the patient or the patient subgroup.

46  
47 The scale of the global CVD burden means that there is a pressing need to develop  
48 new pharmaceutical therapeutics in this area that both address clinical need and can

1 sustain the pharmaceutical industry as intellectual property protection expires around  
2 current therapeutics. Multi-drug interventions of the type identified here have a vast  
3 untapped potential to contribute to future therapeutics in this way.

#### 4 5 **Acknowledgements**

6 We are indebted to Patricia Navarro for assistance with figure production.

#### 7 8 **Sources of Funding**

9 This work was supported by grant of £11.5M awarded to Professor Tony Bjourson  
10 from European Union Regional Development Fund (ERDF) EU Sustainable  
11 Competitiveness Programme for N. Ireland; Northern Ireland Public Health Agency  
12 (Health and Social Care R&D) & Ulster University. Cloud computing resources were  
13 provided by a Microsoft Azure for Research award to Dr Steven Watterson.

#### 14 15 **Disclosures**

16 None.

#### 17 18 **References**

- 19 [1] Heidenreich PA, Trogon JG, Khavjou OA, Butler J, Dracup K, Ezekowitz MD,  
20 Finkelstein EA, Hong Y, Johnston SC, Khara A, Lloyd-Jones DM, Nelson SA, Nichol  
21 G, Orenstein D, Wilson PW, Woo YJ; American Heart Association Advocacy  
22 Coordinating Committee; Stroke Council; Council on Cardiovascular Radiology and  
23 Intervention; Council on Clinical Cardiology; Council on Epidemiology and  
24 Prevention; Council on Arteriosclerosis; Thrombosis and Vascular Biology; Council  
25 on Cardiopulmonary; Critical Care; Perioperative and Resuscitation; Council on  
26 Cardiovascular Nursing; Council on the Kidney in Cardiovascular Disease; Council  
27 on Cardiovascular Surgery and Anesthesia, and Interdisciplinary Council on Quality  
28 of Care and Outcomes Research. Forecasting the future of cardiovascular disease in  
29 the United States: A policy statement from the American Heart Association.  
30 *Circulation*. 2011; 123(8):933-44. doi: 10.1161/CIR.0b013e31820a55f5  
31  
32 [2] Parton A, Mcgilligan V, O’Kane M, Watterson S. Computational modelling of  
33 atherosclerosis. *Briefings in bioinformatics* 2016; 17(4): 562-575 . doi:  
34 10.1093/bib/bbv081.  
35  
36 [3] Di Tomaso G, Díaz-Zuccarini V and Pichardo-Almarza C, A multiscale model of  
37 atherosclerotic plaque formation at its early stage, *IEEE Transactions on Biomedical*  
38 *Engineering* 2011; 58(12): 3460-63. doi: 10.1109/tbme.2011.2165066  
39  
40 [4] Bulelzai MA, Dubbeldam JL. Long time evolution of atherosclerotic plaques.  
41 *Journal of Theoretical Biology* 2012; 297:1–10. doi: 10.1016/j.jtbi.2011.11.023  
42  
43 [5] Gomez-Cabrero D, Compte A, Tegner J, Workflow for generating competing  
44 hypothesis from models with parameter uncertainty, *Interface Focus* 2011; 1(3): 438-  
45 49. doi: 10.1098/rsfs.2011.0015  
46

- 1 [6] Kanehisa M, Furumichi M, Tanabe M, Sato Y, Morishima K, KEGG: new  
2 perspectives on genomes, pathways, diseases and drugs, *Nucleic Acids Research*  
3 2017; 45 (D1), D353-D361. doi: 10.1093/nar/gkw1092  
4
- 5 [7] Fabregat A, Sidiropoulos K, Garapati P, Gillespie M, Hausmann K, Haw R, Jassal  
6 B, Jupe S, Korninger F, McKay S, Matthews L, May B, Milacic M, Rothfels K,  
7 Shamovsky V, Webber M, Weiser J, Williams M, Wu G, Stein L, Hermjakob H,  
8 D'Eustachio P, The Reactome pathway Knowledgebase, *Nucleic Acids Research*  
9 2016; 44(D1): D481-7. doi: 10.1093/nar/gkv1351  
10
- 11 [8] Kutmon M, Riutta A, Nunes N, Hanspers K, Willighagen EL, Bohler A, Mélius J,  
12 Waagmeester A, Sinha SR, Miller R, Coort SL, Cirillo E, Smeets B, Evelo CT, Pico  
13 AR. WikiPathways: capturing the full diversity of pathway knowledge *Nucleic Acids*  
14 *Research* 2016; 44(D1): D488-D494. doi: 10.1093/nar/gkv1024  
15
- 16 [9] Le Novere N, Hucka M, Mi H, Moodie S, Schreiber F, Sorokin A, Demir E,  
17 Wegner K, Aladjem M, Wimalaratne S, Bergman F, Gauges R, Ghazal P, Kawaji H,  
18 Li L, Matsuoka Y, Villéger A, Boyd S, Calzone L, Courtot M, Dogrusoz U, Freeman T,  
19 Funahashi A, Ghosh S, Jouraku A, Kim S, Kolpakov F, Luna A, Sahle S, Schmidt E,  
20 Watterson S, Wu G, Goryanin I, Kell D, Sander C, Sauro H, Snoep J, Kohn K, Kitano  
21 H, The Systems Biology Graphical Notation. *Nature Biotechnology* 2009; 27: 735–41.  
22 doi:10.1038/nbt.1558  
23
- 24 [10] Van Iersel MP, Villéger AC, Czauderna T, Boyd SE, Bergmann FT, Luna A,  
25 Demir E, Sorokin A, Dogrusoz U, Matsuoka Y, Funahashi A, Software support for  
26 SBGN maps: SBGN-ML and LibSBGN, *Bioinformatics* 2012; 28(15): 2016-21. doi:  
27 10.1093/bioinformatics/bts270  
28
- 29 [11] Hucka M, Finney A, Sauro HM, Bolouri H, Doyle JC, Kitano H, Arkin AP,  
30 Bornstein BJ, Bray D, Cornish-Bowden A, Cuellar AA, The systems biology markup  
31 language (SBML): a medium for representation and exchange of biochemical  
32 network models, *Bioinformatics* 2003; 19(4): 524-31. doi:  
33 10.1093/bioinformatics/btg015  
34
- 35 [12] Lima JA, Desai MY, Steen H, Warren WP, Gautam S, Lai S, Statin-induced  
36 cholesterol lowering and plaque regression after 6 months of magnetic resonance  
37 imaging–monitored therapy, *Circulation* 2004; 110(16): 2336-41. doi:  
38 10.1161/01.CIR.0000145170.22652.51  
39
- 40 [13] Nicholls SJ, Puri R, Anderson T, Ballantyne CM, Cho L, Kastelein JJP, Koenig  
41 W, Somaratne R, Kassahun H, Yang J, Wasserman SM, Scott R, Ungi I, Podolec J,  
42 Ophuis AO, Cornel JH, Borgman M, Brennan DM, Nissen SE, Effect of Evolocumab  
43 on Progression of Coronary Disease in Statin-Treated PatientsThe GLAGOV  
44 Randomized Clinical Trial. *JAMA* 2016; 316(22): 2373-2384. doi:  
45 10.1001/jama.2016.16951  
46
- 47 [14] Zimmer S, Grebe A, Bakke SS, Bode N, Halvorsen B, Ulas T, Skjelland M, De  
48 Nardo D, Labzin LI, Kerksiek A, Hempel C, Cyclodextrin promotes atherosclerosis

- 1 regression via macrophage reprogramming, *Science Translational Medicine* 2016;  
2 8(333): 333ra50. doi: 10.1126/scitranslmed.aad6100  
3
- 4 [15] Funahashi A, Matsuoka Y, Jouraku A, Morohashi M, Kikuchi N, Kitano H,  
5 CellDesigner 3.5: A Versatile Modeling Tool for Biochemical Networks, Proceedings  
6 of the IEEE 2008; 96(8):1254 – 1265. doi: 10.1109/JPROC.2008.925458  
7
- 8 [16] Placzek S, Schomburg I, Chang A, Jeske L, Ulbrich M, Tillack J, Schomburg D,  
9 BRENDA in 2017: new perspectives and new tools in BRENDA, *Nucleic Acids*  
10 *Research* 2017; 45(D1), D380–D388. doi: 10.1093/nar/gkw952  
11
- 12 [17] O'Keefe JH, Cordain L, Harris WH, Moe RM, Vogel R. Optimal low-density  
13 lipoprotein is 50 to 70 mg/dl: lower is better and physiologically normal. *Journal of the*  
14 *American College of Cardiology* 2004; 43(11):2142-6. doi:  
15 10.1016/j.jacc.2004.03.046  
16
- 17 [18] Boden WE. High-density lipoprotein cholesterol as an independent risk factor in  
18 cardiovascular disease: assessing the data from Framingham to the Veterans Affairs  
19 High-Density Lipoprotein Intervention Trial. *The American Journal of Cardiology*  
20 2000; 86(12):19-22. doi: 10.1016/S0002-9149(00)01464-8  
21
- 22 [19] Brandt R, Richter T, Haug K, Wilhelm MG, Maurer PC, Nathrath W,  
23 Topographic analysis of proliferative activity in carotid endarterectomy specimens by  
24 immunocytochemical detection of the cell cycle-related antigen ki-67. *Circulation*  
25 1997; 96(10) 3360-8. doi: 10.1161/01.CIR.96.10.3360  
26
- 27 [20] Bonanno E, Mauriello A, Partenzi A, Anemona L, Spagnoli LG, Flow cytometry  
28 analysis of atherosclerotic plaque cells from human carotids: A validation study.  
29 *Cytometry* 2000; 39(2):158–65. doi: 10.1002/(SICI)1097-  
30 0320(20000201)39:2<158::AID-CYTO9>3.0.CO;2-8  
31
- 32 [21] von Birgelen C, Mintz GS, De Vrey EA, Kimura T, Popma JJ, Airiian SG, Leon  
33 MB, Nobuyoshi M, Serruys PW, De Feyter PJ. Atherosclerotic coronary lesions with  
34 inadequate compensatory enlargement have smaller plaque and vessel volumes:  
35 observations with three dimensional intravascular ultrasound in vivo. *Heart* 1998;  
36 79(2):137-42. doi: 10.1136/hrt.79.2.137  
37
- 38 [22] Van Dijk RA, Duiniveld AJ, Schaapherder AF, Mulder-Stapel A, Hamming JF,  
39 Kuiper J, de Boer OJ, van der Wal AC, Kolodgie FD, Virmani R, Lindeman JH. A  
40 change in inflammatory footprint precedes plaque instability: a systematic evaluation  
41 of cellular aspects of the adaptive immune response in human atherosclerosis.  
42 *Journal of the American Heart Association* 2015; 4(4): e001403. doi:  
43 10.1161/JAHA.114.001403.  
44
- 45 [23] Arakelyan A, Petrakova J, Hermanova Z, Boyajyan A, Lukl J, Petrek M. Serum  
46 levels of the MCP-1 chemokine in patients with ischemic stroke and myocardial  
47 infarction. *Mediators of Inflammation* 2005; 2005(3):175–9. doi: 10.1155/MI.2005.175



- 1 [24] Yu HT, Oh J, Chang HJ, Lee SH, Shin EC, Park S. Serum monokine induced by  
2 gamma interferon as a novel biomarker for coronary artery calcification in humans.  
3 *Coronary Artery Disease* 2015; 26(4):317-21. doi: 10.1097/MCA.0000000000000236  
4
- 5 [25] Ferdousie VT, Mohammadi M, Hassanshahi G, Khorramdelazad H, Falahati-  
6 pour SK, Mirzaei M, Tavakoli MA, Kamiab Z, Ahmadi Z, Vazirinejad R, Shahrabadi E.  
7 Serum CXCL10 and CXCL12 chemokine levels are associated with the severity of  
8 coronary artery disease and coronary artery occlusion. *International Journal of*  
9 *Cardiology* 2017; 233:23-8. doi: 10.1016/j.ijcard.2017.02.011  
10
- 11 [26] Kao J, Kobashigawa J, Fishbein MC, MacLellan WR, Burdick MD, Belperio JA,  
12 Strieter RM. Elevated serum levels of the CXCR3 chemokine ITAC are associated  
13 with the development of transplant coronary artery disease. *Circulation*  
14 2003;107(15):1958-61. doi: 10.1161/01.CIR.0000069270.16498.75  
15
- 16 [27] Di Iorio A, Ferrucci L, Sparvieri E, Cherubini A, Volpato S, Corsi A, Bonafè M,  
17 Franceschi C, Abate G, Paganelli R. Serum IL-1 $\beta$  levels in health and disease: a  
18 population-based study. 'The InCHIANTI study'. *Cytokine* 2003; 22(6):198-205. doi:  
19 10.1016/S1043-4666(03)00152-2  
20
- 21 [28] Molloy KJ, Thompson MM, Schwalbe EC, Bell PR, Naylor AR, Loftus IM.  
22 Comparison of levels of matrix metalloproteinases, tissue inhibitor of  
23 metalloproteinases, interleukins, and tissue necrosis factor in carotid endarterectomy  
24 specimens from patients on versus not on statins preoperatively. *The American*  
25 *Journal of Cardiology* 2004;94(1):144-6. doi: 10.1016/j.amjcard.2004.03.050  
26
- 27 [29] Grufman H, Schiopu A, Edsfeldt A, Björkbacka H, Nitulescu M, Nilsson M,  
28 Persson A, Nilsson J, Gonçalves I. Evidence for altered inflammatory and repair  
29 responses in symptomatic carotid plaques from elderly patients. *Atherosclerosis*  
30 2014; 237(1):177-82. doi: 10.1016/j.atherosclerosis.2014.08.042  
31
- 32 [30] Herder C, Peeters W, Zierer A, de Kleijn DPV, Moll FL, Karakas M, Roden M,  
33 Meisinger C, Thorand B, Pasterkamp G, Koenig W, TGF-b1 content in  
34 atherosclerotic plaques, TGF-b1 serum concentrations and incident coronary events.  
35 *European Journal of Clinical Investigation* 2012; 42(3):329–37. doi: 10.1111/j.1365-  
36 2362.2011.02587.x  
37
- 38 [31] Ramalho LS, Oliveira LF, Cavellani CL, Ferraz ML, de Oliveira FA, Miranda  
39 Corrêa RR, de Paula Antunes Teixeira V, De Lima Pereira SA. Role of mast cell  
40 chymase and tryptase in the progression of atherosclerosis: Study in 44 autopsied  
41 cases. *Annals of Diagnostic Pathology* 2013; 17(1):28–31. doi:  
42 10.1016/j.anndiagpath.2012.04.007  
43
- 44 [32] Herder C, Peeters W, Illig T, Baumert J, De Kleijn DP, Moll FL, Poschen U,  
45 Klopp N, Müller-Nurasyid M, Roden M, Preuss M. RANTES/CCL5 and risk for  
46 coronary events: results from the MONICA/KORA Augsburg case-cohort, Athero-  
47 Express and CARDIoGRAM studies. *PloS One* 2011; 6(12):e25734. doi:  
48 10.1371/journal.pone.0025734

- 1  
2 [33] Stein A, Montens HP, Steppich B, Busch G, Brandl R, Ott I. Circulating  
3 endothelial progenitor cells decrease in patients after endarterectomy. *Journal of*  
4 *Vascular Surgery* 2008; 48(5):1217–22. doi: 10.1016/j.jvs.2008.06.018  
5  
6 [34] Gonçalves I, Moses J, Dias N, Pedro LM, e Fernandes JF, Nilsson J, Ares MP.  
7 Changes related to age and cerebrovascular symptoms in the extracellular matrix of  
8 human carotid plaques. *Stroke* 2003; 34(3):616-22. doi:  
9 10.1161/01.STR.0000058157.69113.F6  
10  
11 [35] Nishi, K., Itabe, H., Uno, M., Kitazato, K.T., Horiguchi, H., Shinno, K., and  
12 Nagahiro, S. Oxidized LDL in carotid plaques and plasma associates with plaque  
13 instability. *Arteriosclerosis, Thrombosis and Vascular Biology* 2002; 22, 1649–1654.  
14 doi: 10.1161/01.ATV.0000033829.14012.18  
15  
16 [36] Hoff, H, Gaubatz, JW, and Gotto Jr AM, Apo B concentration in the normal  
17 human aorta. *Biochemical and Biophysical Research Communications* 1978; 85,  
18 1424–1430. doi: 10.1016/0006-291X(78)91162-2  
19  
20 [37] Ragino YI, Chernyavski AM, Polonskaya YV, Volkov AM, Kashtanova EV.  
21 Activity of the inflammatory process in different types of unstable atherosclerotic  
22 plaques. *Bulletin of Experimental Biology and Medicine* 2012; 153(2): 186-9. doi:  
23 10.1007/s10517-012-1672-1  
24  
25 [38] Sakai N, Uchida Y, Ohashi K, Hibuse T, Saika Y, Tomari Y, Kihara S, Hiraoka H,  
26 Nakamura T, Ito S, Yamashita S, Matsuzawa Y, Measurement of fasting serum  
27 apoB-48 levels in normolipidemic and hyperlipidemic subjects by ELISA. *Journal of*  
28 *Lipid Research* 44:1256–62 (2003). doi: 10.1194/jlr.M300090-JLR200  
29  
30 [39] Szodoray P, Timar O, Veres K, Der H, Szomjak E, Lakos G, Aleksza M, Nakken  
31 B, Szegedi G, Soltesz P. TH1/TH2 imbalance, measured by circulating and  
32 intracytoplasmic inflammatory cytokines–immunological alterations in acute coronary  
33 syndrome and stable coronary artery disease. *Scandinavian Journal of Immunology*  
34 2006; 64(3): 336-344. doi: 10.1111/j.1365-3083.2006.01816.x  
35  
36 [40] Trogan E, Feig JE, Dogan S, Rothblat GH, Angeli V, Tacke F, Randolph GJ,  
37 Fisher EA. Gene expression changes in foam cells and the role of chemokine  
38 receptor CCR7 during atherosclerosis regression in ApoE-deficient mice.  
39 *Proceedings of the National Academy of Sciences of the United States of America.*  
40 2006;103(10):3781-6. doi: 10.1073/pnas.0511043103  
41  
42 [41] Benson H, Watterson S, Sharman J, Mpamhanga C, Parton A, Southan C,  
43 Harmar A, Ghazal P, Is systems pharmacology ready to impact upon therapy  
44 development? A study on the cholesterol biosynthesis pathway. *British Journal of*  
45 *Pharmacology* (in press) doi: 10.1111/bph.14037 (2017)  
46  
47 [42] Hauer A, Uyttenhove C, de Vos P, Stroobant V, Renauld J, van Berkel T, van  
48 Snick J, Kuiper J, Blockade of Interleukin-12 Function by Protein Vaccination

- 1 Attenuates Atherosclerosis, *Circulation* 2005; 112:1054-1062. doi:  
2 10.1161/CIRCULATIONAHA.104.533463  
3
- 4 [43] Westerterp M, Murphy A, Wang M, Pagler T, Vengrenyuk Y, Kappus M, Gorman  
5 D, Nagareddy P, Zhu X, Abramowicz S, Parks J, Welch C, Fisher E, Wang N, Yvan-  
6 Charvet L, Tall AR, Deficiency of ABCA1 and ABCG1 in Macrophages Increases  
7 Inflammation and Accelerates Atherosclerosis in Mice. *Circulation Research* 2013;  
8 112(11). doi: 10.1161/CIRCRESAHA.113.301086  
9
- 10 [44] Qiao JH, Tripathi J, Mishra NK, Cai Y, Tripathi S, Wang X, Imes S, Fishbein MC,  
11 Clinton SK, Libby P, Lusis AP, Rajavashisth TB, Role of Macrophage Colony-  
12 Stimulating Factor in Atherosclerosis: Studies of Osteopetrotic Mice. *The American*  
13 *Journal of Pathology* 1997; 150(5): 1687–1699.  
14
- 15 [45] Gupta S, Pablo AM, Jiang Xc, Wang N, Tall AR, Schindler C, IFN-gamma  
16 potentiates atherosclerosis in ApoE knock-out mice, *Journal of Clinical Investigations*  
17 1997; 99(11):2752-61. doi: 10.1172/JCI119465  
18
- 19 [46] Whitman SC, Ravisankar P, Daugherty A. Interleukin-18 enhances  
20 atherosclerosis in apolipoprotein E<sup>-/-</sup> mice through release of interferon- $\gamma$ .  
21 *Circulation Research* 2002; 90(2):e34-8. doi: 10.1161/hh0202.105292
- 22
- 23 [47] Delgado-Roche L, Brito V, Acosta E, Pérez A, Fernández JR, Hernández-Matos  
24 Y, Griñán T, Soto Y, León OS, Marleau S, Vázquez AM. Arresting progressive  
25 atherosclerosis by immunization with an anti-glycosaminoglycan monoclonal  
26 antibody in apolipoprotein E-deficient mice. *Free Radical Biology and Medicine* 2015;  
27 89:557-66. doi: 10.1016/j.freeradbiomed.2015.08.027  
28
- 29 [48] Adiguzel E, Ahmad PJ, Franco C, Bendeck MP. Collagens in the progression  
30 and complications of atherosclerosis. *Vascular Medicine*. 2009;14(1):73-89. doi:  
31 10.1177/1358863X08094801  
32
- 33 [49] Vickers K, Maguire C, Wolfert R, Burns A, Reardon M, Geis R, Holvoet P,  
34 Morrisett J, Relationship of lipoprotein-associated phospholipase A2 and oxidized  
35 low density lipoprotein in carotid atherosclerosis, *Journal of Lipid Research* 2009;  
36 50(9), 1735-1743. doi: 10.1194/jlr.M800342-JLR200  
37
- 38 [50] Ferns GA, Raines EW, Sprugel KH, Motani AS, Reidy MA, Ross R, Inhibition of  
39 neointimal smooth muscle accumulation after angioplasty by an antibody to PDGF.  
40 *Science* 1991; 253(5024), 1129-32. doi: 10.1126/science.1653454  
41
- 42 [51] Gibson D, Drain S, Kelly C, McGilligan V, McClean P, Atkinson S, Murray E,  
43 McDowell A, Conway C, Watterson S, Bjourson A, Coincidence versus  
44 consequence: opportunities in multi-morbidity research and inflammation as a  
45 pervasive feature, *Expert Review of Precision Medicine and Drug Development*  
46 2017; 2(3): 147-156

1 **Figure Legends**

2

3 Figure 1. A map of atherosclerotic plaque dynamics shown using the Systems  
4 Biology graphical Notation (SBGN).

5

6 Figure 2. The legend for the SBGN schema used in Figure 1.

7

8 Figure 3. (A) Smooth muscle cell concentrations, (B) macrophage and foam cell  
9 concentrations and (C) Th1 cell concentrations during plaque development for the  
10 three blood LDL/HDL profiles 190/40 mg/dl, 110/50 mg/dl and 50/50 mg/dl.

11

12 Figure 4. The performance of the model for clinical requirements determined from the  
13 literature.

14

15 Figure 5. The performance of the model for further clinical observations.

16

17 Figure 6: The model viewed in using the A) Newt B) PathVisio and C) VANTED  
18 platforms and D) viewed as plain text XML.

19

20 Figure 7. A) Convergence on an atheroprotective multi-drug intervention hypothesis.  
21 B-D) The impact of that intervention on key plaque components when applied after  
22 40 years of a high risk LDL/HDL profile of 190/40mg/dl.

23

24

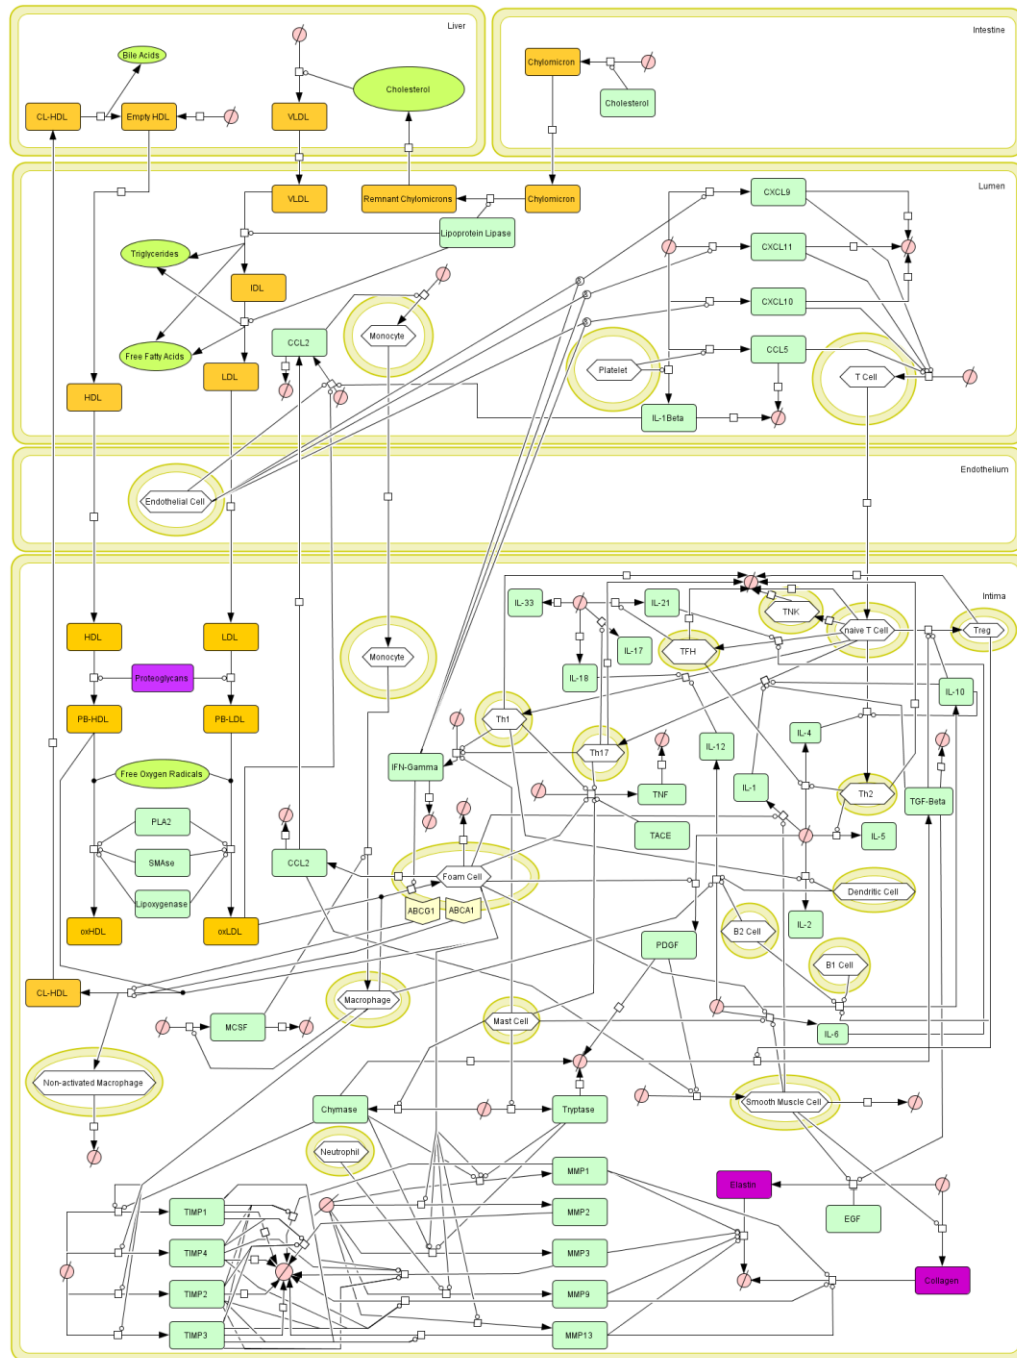

1  
2  
3  
4

**Figure 1. A map of atherosclerotic plaque dynamics shown using the Systems Biology graphical Notation (SBGN).**

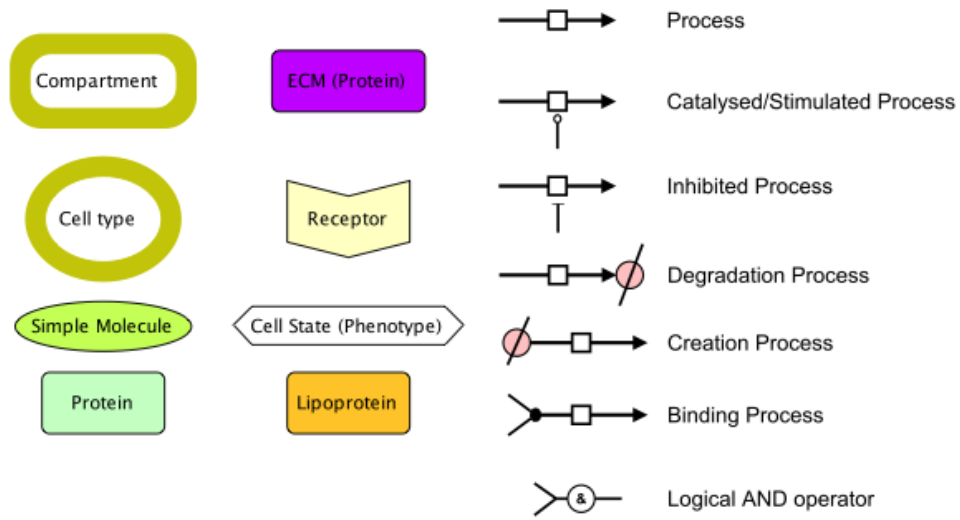

1  
2

---

Figure 2. The legend for the SBGN schema used in Figure 1.

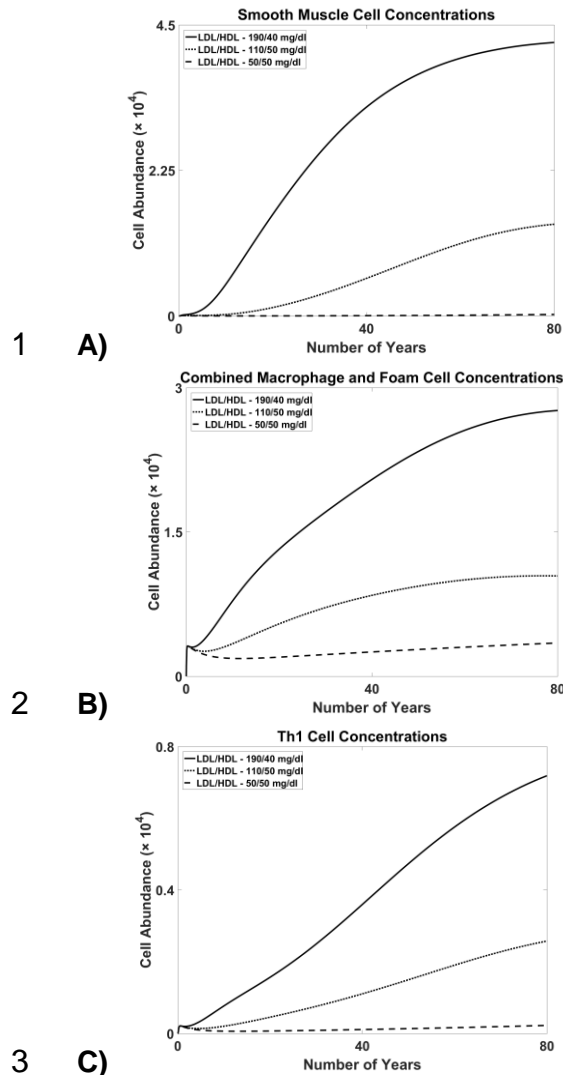

**Figure 3. (A) Smooth muscle cell concentrations, (B) macrophage and foam cell concentrations and (C) Th1 cell concentrations during plaque development for the three blood LDL/HDL profiles 190/40 mg/dl, 110/50 mg/dl and 50/50 mg/dl.**

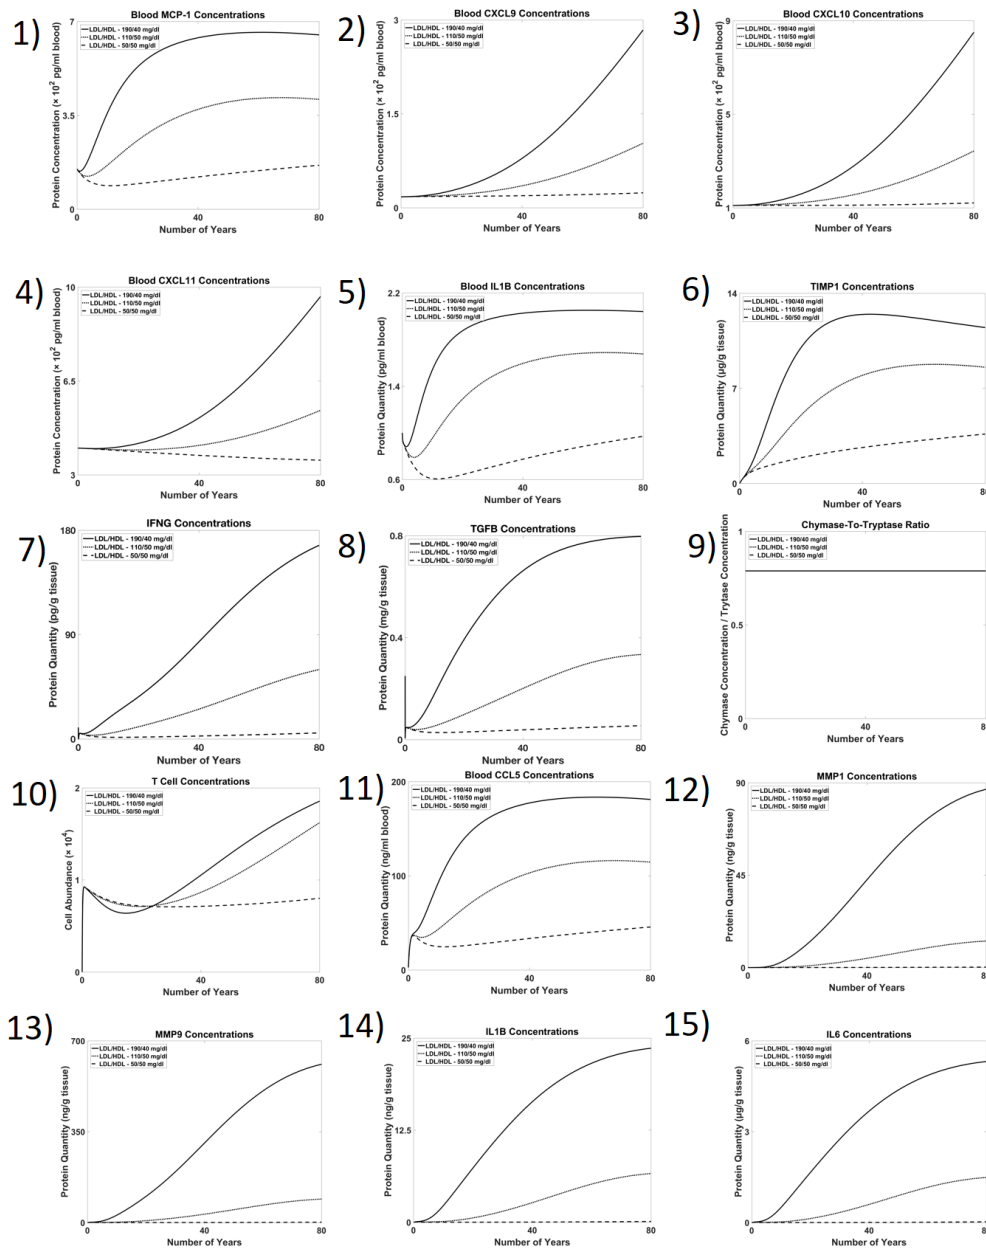

1  
2



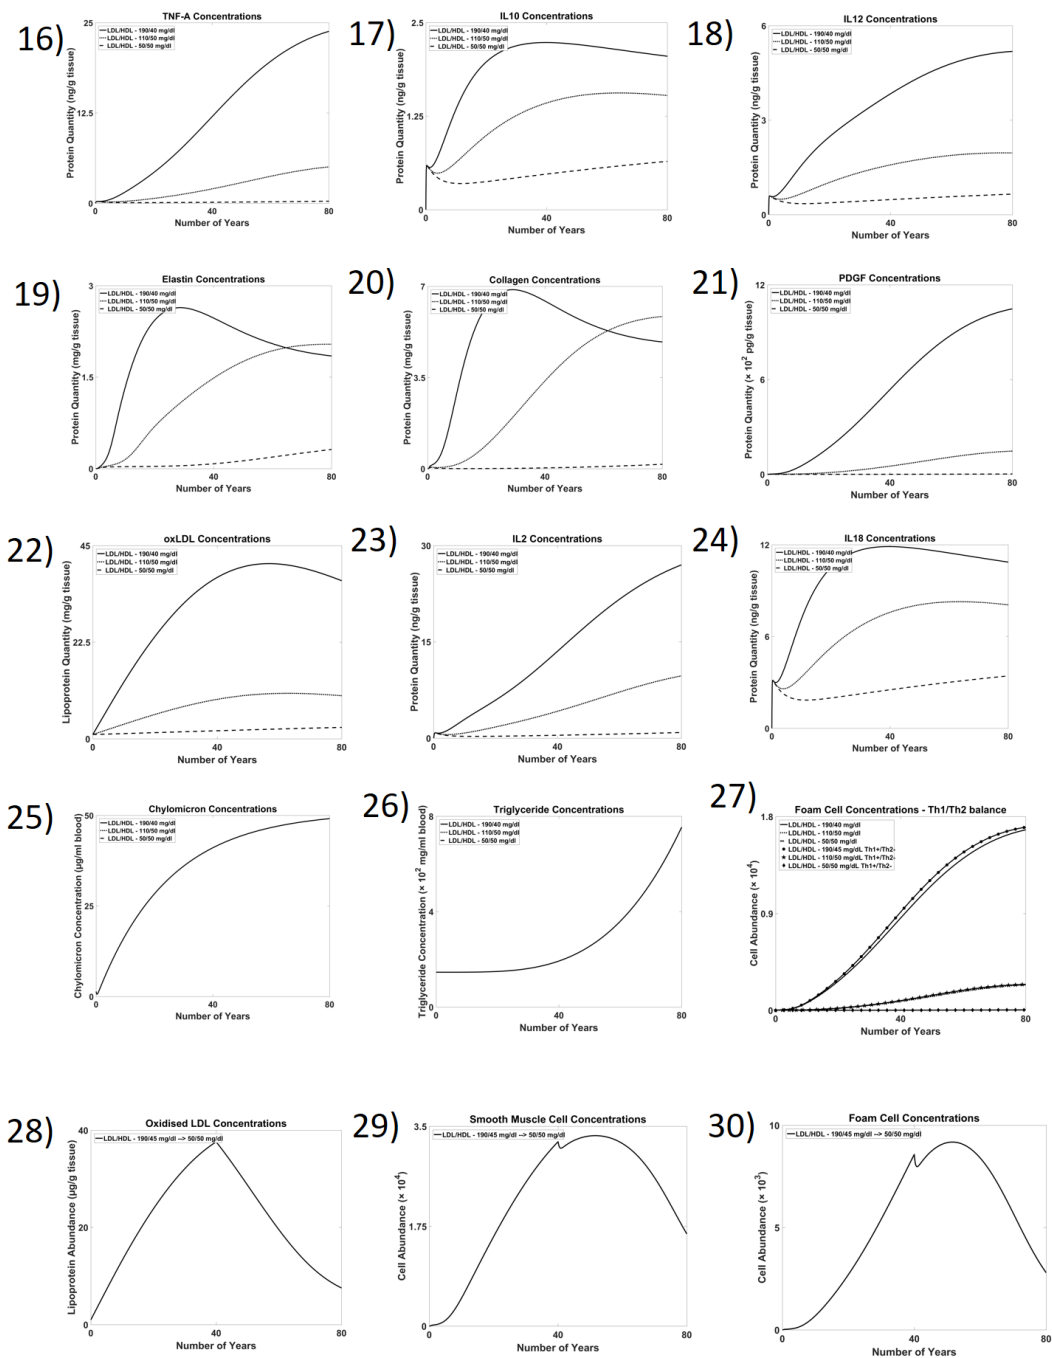

1  
2 **Figure 4. The performance of the model for clinical requirements determined**  
3 **from the literature**

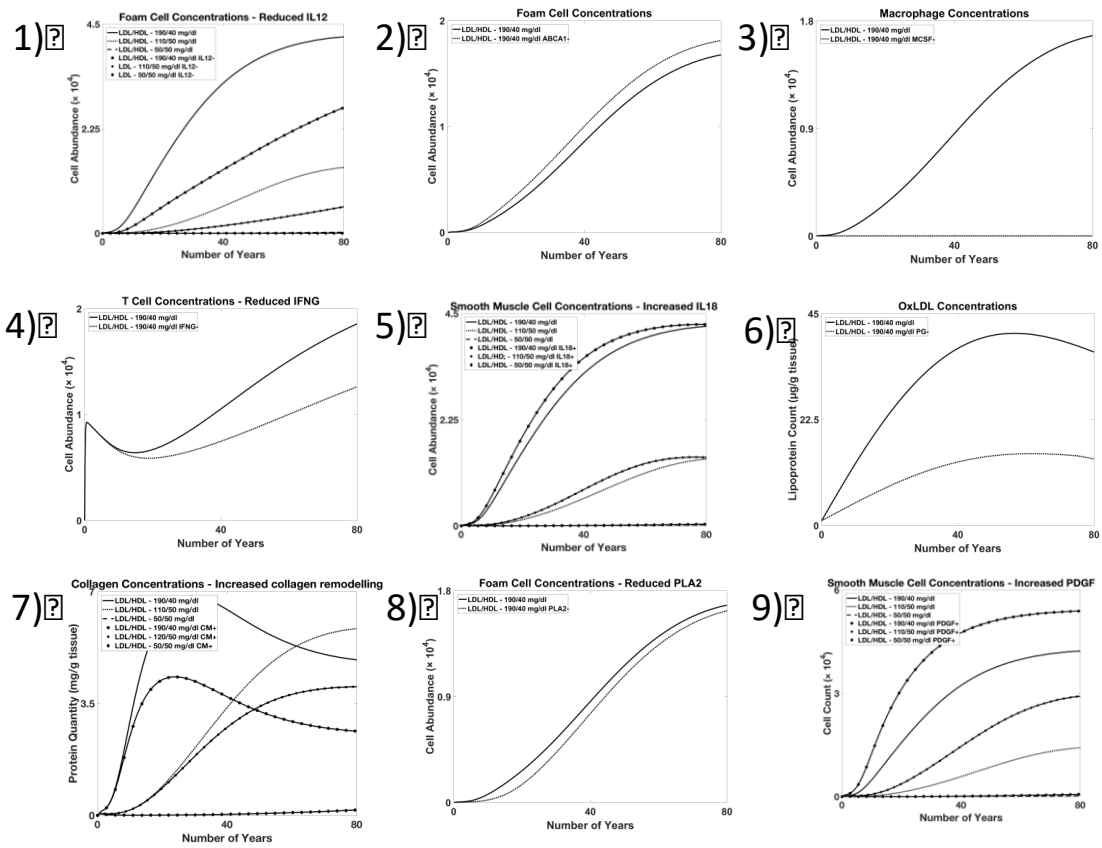

1  
2  
3

Figure 5. The performance of the model for further clinical observations.

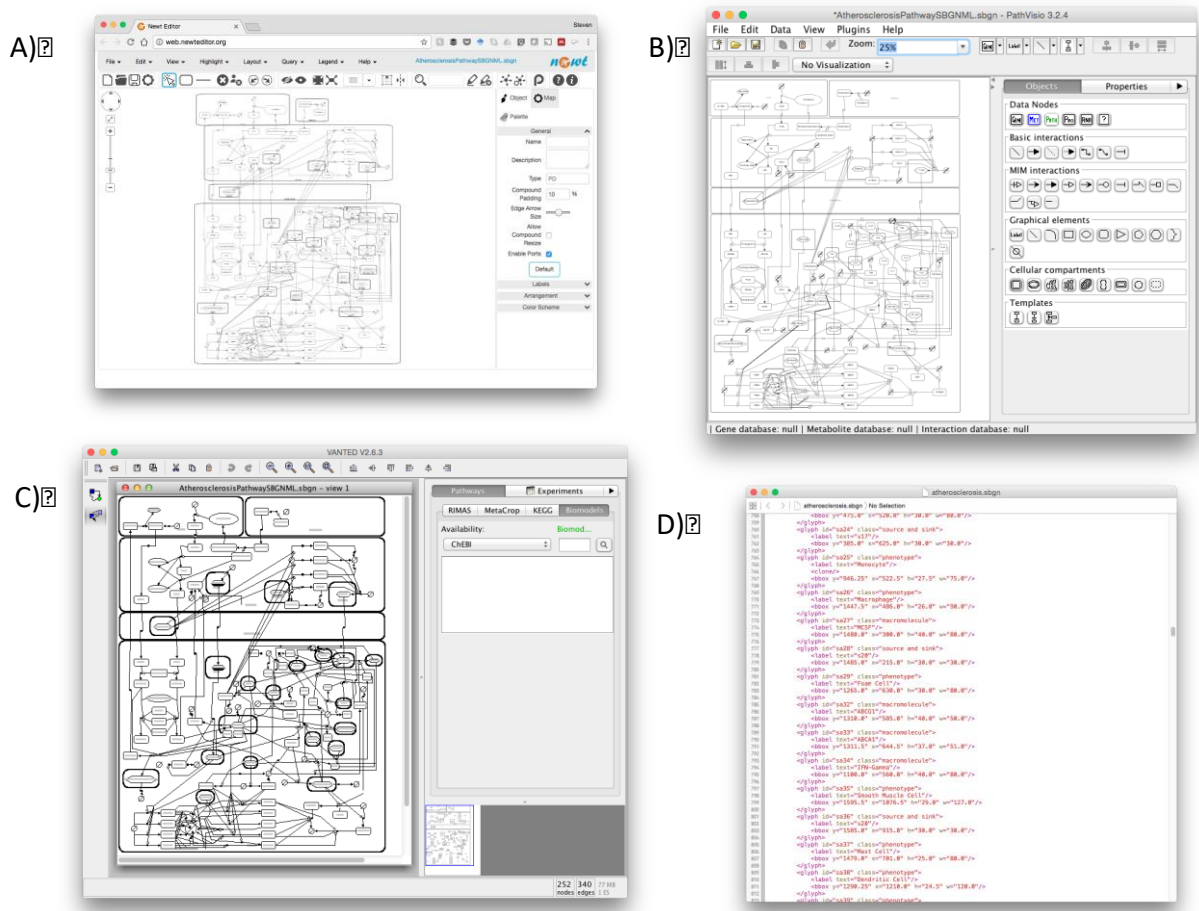

1  
2  
3  
4

**Figure 6: The model viewed in using the A) Newt B) PathVisio and C) VANTED platforms and D) viewed as plain text XML.**

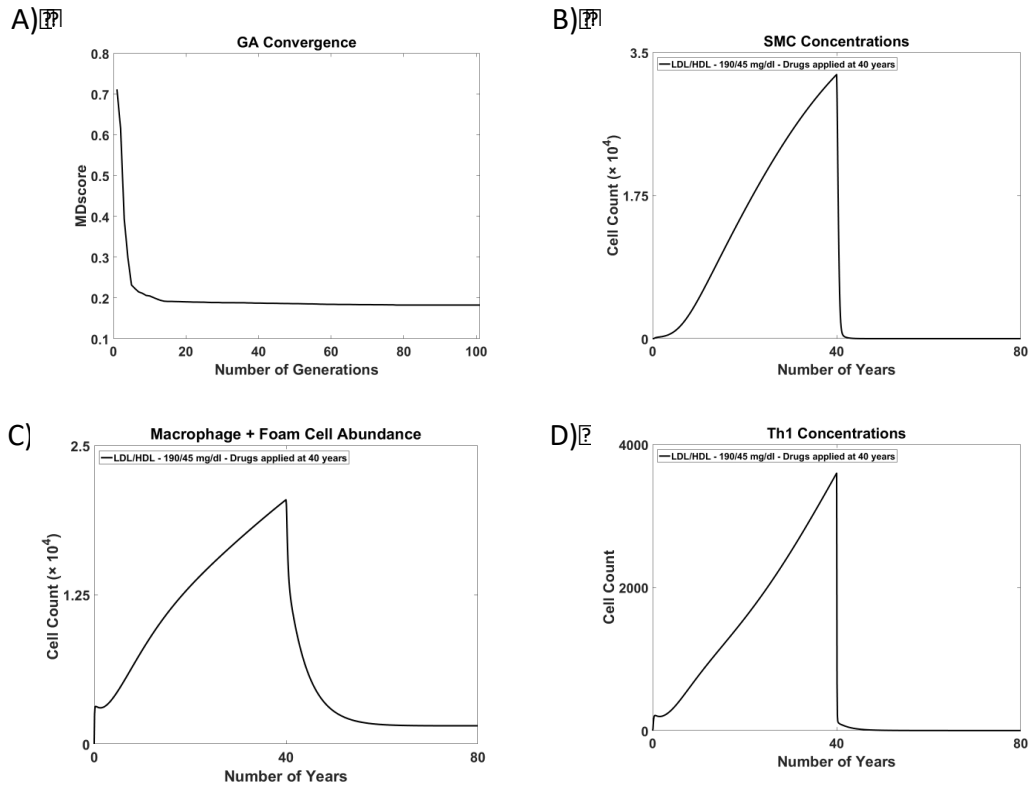

1  
2  
3  
4  
5

**Figure 7. A) Convergence on an atheroprotective multi-drug intervention hypothesis. B-D) The impact of that intervention on key plaque components when applied after 40 years of a high risk LDL/HDL profile of 190/40mg/dl.**
